# Supplementary material
Source: publisher site journal article supplement (https://www.dovepress.com/article/574069)
Supplement: Supplementary file 1 [file Supplementary_Material.docx]

**Supplementary Material**

**Supplementary table 1.** List of All Included Variables with Their Respective Units

| Categories | Clinical indicator | Unit |
| --- | --- | --- |
| Demographic data | Age | year |
|  | Sex | / |
|  | Body Mass Index（BMI） | Kg/m2 |
|  | Smoking history | / |
|  | Drinking alcohol history | / |
| Comorbidities | hypertension | Yes or not |
|  | diabetes | Yes or not |
|  | stroke | Yes or not |
|  | Number of atrial fibrillation ablations | Times |
| Complete Blood Count | White Blood Cell Count (WBC) | 10^9/L |
|  | Red Blood Cell Count (RBC) | 10^12/L |
|  | Platelet Count (PLT) | 10^9/L |
|  | Hemoglobin (Hb) | g/L |
|  | Neutrophil Percentage (Neut%) | % |
| Coagulation function | D-Dimer | ng/mL |
| Comprehensive Metabolic Panel | Aspartate Aminotransferase (AST) | U/L |
|  | Alanine Aminotransferase (ALT) | U/L |
|  | Gamma-Glutamyl Transferase (GGT) | U/L |
|  | Alkaline Phosphatase (ALP) | U/L |
|  | Direct Bilirubin (DBIL) | umol/L |
|  | Indirect Bilirubin (IBIL) | umol/L |
|  | Creatinine (Crea) | umol/L |
|  | Uric Acid (UA) | umol/L |
|  | Urea | mmol/L |
|  | Free Fatty Acids (FFA) | mmol/L |
|  | Total Protein (TP) | g/L |
|  | Albumin (ALB) | g/L |
|  | Globulin (GLO) | g/L |
|  | Cystatin C (Cys-C) | mg/L |
| Glucose level | Glycosylated Hemoglobin, Type A1C (HbA1c) | % |
| Lipid Profile | Total Cholesterol (TC) | mmol/L |
|  | Triglyceride (TG) | mmol/L |
|  | Low-Density Lipoprotein Cholesterol (LDL-C) | mmol/L |
|  | High-Density Lipoprotein Cholesterol (HDL-C) | mmol/L |
|  | Lipoprotein a (LPa) | mg/L |
|  | Apolipoprotein A1 (apoA1) | g/L |
|  | Apolipoprotein B, apoB) | g/L |
| Thyroid function | Thyroid-Stimulating Hormone (TSH) | mIU/L |
|  | Total Thyroxine (TT4) | nmol/L |
|  | Total Triiodothyronine (TT3) | nmol/L |
| Cardiac biomarkers | N-Terminal Pro-B-Type Natriuretic Peptide (NT-ProBNP) | ng/L |
|  | Creatine Kinase (CK) | IU/L |
| Echocardiogram | left Atrium (LA) | mm |
|  | Right Atrium (RA) | mm |
|  | Left Ventricular End-Diastolic Diameter (LVEDd) | mm |
|  | Left Ventricular Ejection Fraction (LVEF) | % |

**Supplementary Table 2**. Comparison of train set and test set baseline information

| Variables | Train set (n = 751) | Test set (n = 322) | *P* |
| --- | --- | --- | --- |
|
| Neut, % | 55.99 ± 8.71 | 56.03 ± 7.96 | 0.945 |
| RBC, 10^12/L | 4.60 ± 0.53 | 4.63 ± 0.59 | 0.439 |
| Age, year | 63.00 (55.00, 71.00) | 62.00 (54.00, 69.75) | 0.153 |
| D-Dimer, ng/mL | 67.67 (37.50, 122.00) | 74.50 (39.25, 125.00) | 0.231 |
| GGT, U/L | 24.00 (17.00, 38.00) | 22.00 (16.12, 32.45) | 0.054 |
| AST, U/L | 19.10 (15.90, 23.60) | 19.30 (15.62, 23.90) | 0.791 |
| HbA1c, % | 6.00 (5.70, 6.50) | 6.00 (5.70, 6.44) | 0.261 |
| RA, mm | 36.00 (33.00, 41.00) | 36.00 (33.00, 39.00) | 0.789 |
| TG, mmol/L | 1.09 (0.83, 1.56) | 1.15 (0.83, 1.57) | 0.183 |
| LVEF, % | 61.90 (58.98, 63.37) | 61.68 (58.22, 63.83) | 0.599 |
| Urea, mmol/L | 5.60 (4.70, 6.80) | 5.53 (4.50, 6.70) | 0.207 |
| FFA, mmol/L | 0.41 (0.30, 0.54) | 0.41 (0.30, 0.54) | 0.845 |
| GLO, g/L | 23.40 (20.90, 26.30) | 24.00 (21.10, 27.20) | 0.139 |
| Crea, umol/L | 74.20 (64.00, 87.13) | 77.00 (66.00, 88.93) | 0.362 |
| TT3, nmol/L | 1.62 (1.40, 1.82) | 1.64 (1.42, 1.83) | 0.512 |
| TSH, mIU/L | 2.42 (1.55, 3.75) | 2.56 (1.72, 3.88) | 0.195 |
| ApoB, g/L | 0.74 (0.59, 0.94) | 0.77 (0.62, 0.95) | 0.115 |
| PLT, 10^9/L | 195.00 (164.50, 231.00) | 202.00 (166.00, 232.00) | 0.241 |
| ApoA1, g/L | 1.12 (1.00, 1.27) | 1.14 (1.02, 1.29) | 0.210 |
| ALT, U/L | 17.90 (13.34, 24.65) | 18.79 (13.40, 26.18) | 0.459 |
| LVEDd, mm | 49.00 (47.00, 51.00) | 49.00 (47.00, 51.00) | 0.456 |
| UA, umol/L | 328.00 (268.05, 395.00) | 329.13 (271.72, 399.48) | 0.875 |
| TT4, nmol/L | 88.57 (78.22, 100.70) | 91.85 (80.52, 101.88) | 0.061 |
| TP, g/L | 65.10 (62.05, 68.60) | 65.75 (62.30, 69.07) | 0.165 |
| HDL-C, mmol/L | 1.01 (0.86, 1.18) | 1.02 (0.88, 1.19) | 0.428 |
| Hb, g/L | 141.00 (130.00, 151.00) | 141.50 (128.00, 154.00) | 0.799 |
| LPa, mg/L | 110.56 (56.67, 215.45) | 125.70 (60.97, 251.32) | 0.228 |
| LDL-C, mmol/L | 2.24 (1.76, 2.77) | 2.34 (1.80, 2.84) | 0.161 |
| Cys-C, mg/L | 0.98 (0.83, 1.16) | 0.96 (0.81, 1.12) | 0.121 |
| NT-ProBNP, ng/L | 501.75 (155.70, 1040.00) | 442.57 (137.12, 1100.00) | 0.255 |
| WBC, 10^12/L | 5.73 (4.81, 6.69) | 5.93 (5.00, 6.89) | 0.072 |
| TC, mmol/L | 3.52 (2.93, 4.13) | 3.63 (3.02, 4.28) | 0.114 |
| DBIL, umol/L | 4.59 (3.15, 6.21) | 4.18 (3.07, 6.00) | 0.132 |
| ALP, U/L | 66.00 (55.70, 78.00) | 65.40 (53.25, 78.38) | 0.598 |
| BMI, Kg/m2 | 25.78 (23.73, 28.07) | 25.52 (23.27, 28.01) | 0.389 |
| CK, IU/L | 74.00 (54.00, 100.00) | 71.50 (54.50, 100.64) | 0.805 |
| IBIL, umol/L | 9.86 (6.83, 13.96) | 9.77 (6.90, 12.87) | 0.511 |
| LA, mm | 40.00 (35.00, 44.00) | 40.00 (35.00, 44.00) | 0.956 |
| ALB, g/L | 41.50 (39.40, 44.20) | 41.60 (39.50, 43.80) | 0.922 |
| Male, n(%) | 455 (60.59) | 193 (59.94) | 0.842 |
| Smoke, n(%) | 165 (21.97) | 66 (20.50) | 0.590 |
| Hypertension, n(%) | 332 (44.21) | 157 (48.76) | 0.170 |
| Diabetes, n(%) | 114 (15.18) | 47 (14.60) | 0.806 |
| Alcohol, n(%) | 131 (17.44) | 58 (18.01) | 0.823 |
| Stroke, n(%) | 72 (9.59) | 28 (8.70) | 0.645 |
| Secondary Catheter Ablation, n(%) | 245 (32.62) | 107 (33.23) | 0.846 |

**Supplementary Table 3**. Boruta Feature screening results

| Variables | meanImp | medianImp | minImp | maxImp | normHits | decision |
| --- | --- | --- | --- | --- | --- | --- |
| sex | 1.93261449 | 1.8724345 | 0.16460409 | 4.01706 | 0.05050505 | Rejected |
| age | 5.99972442 | 6.0694807 | 3.16261628 | 9.352741 | 0.97979798 | Confirmed |
| GGT | 1.28413045 | 1.4926195 | -1.36688658 | 3.942743 | 0.07070707 | Rejected |
| TG | 2.70419229 | 2.7936887 | -1.26936822 | 7.034789 | 0.57575758 | Tentative |
| LVEF | 4.73570849 | 4.6950982 | 1.30680015 | 7.724249 | 0.92929293 | Confirmed |
| Urea | 3.77231699 | 3.7875893 | 1.23087998 | 7.329077 | 0.81818182 | Confirmed |
| GLO | 3.17106883 | 3.158882 | 0.51857471 | 6.529087 | 0.70707071 | Confirmed |
| smoke | 2.95065316 | 2.8430508 | 0.09599515 | 6.327082 | 0.6969697 | Confirmed |
| Hb | 2.67567731 | 2.5760897 | -0.13880377 | 5.010477 | 0.62626263 | Tentative |
| LPa | -0.07549698 | -0.1710686 | -1.4317386 | 1.147517 | 0 | Rejected |
| Cys-C | 5.56286076 | 5.4342739 | 2.85712409 | 9.040796 | 0.96969697 | Confirmed |
| NT-ProBNP | 17.34343055 | 17.4454658 | 13.13147541 | 21.217733 | 1 | Confirmed |
| DBIL | 4.06054254 | 3.7794628 | 0.81608417 | 6.776269 | 0.81818182 | Confirmed |
| CK | 3.66678861 | 3.6448156 | 1.05405654 | 6.623658 | 0.81818182 | Confirmed |


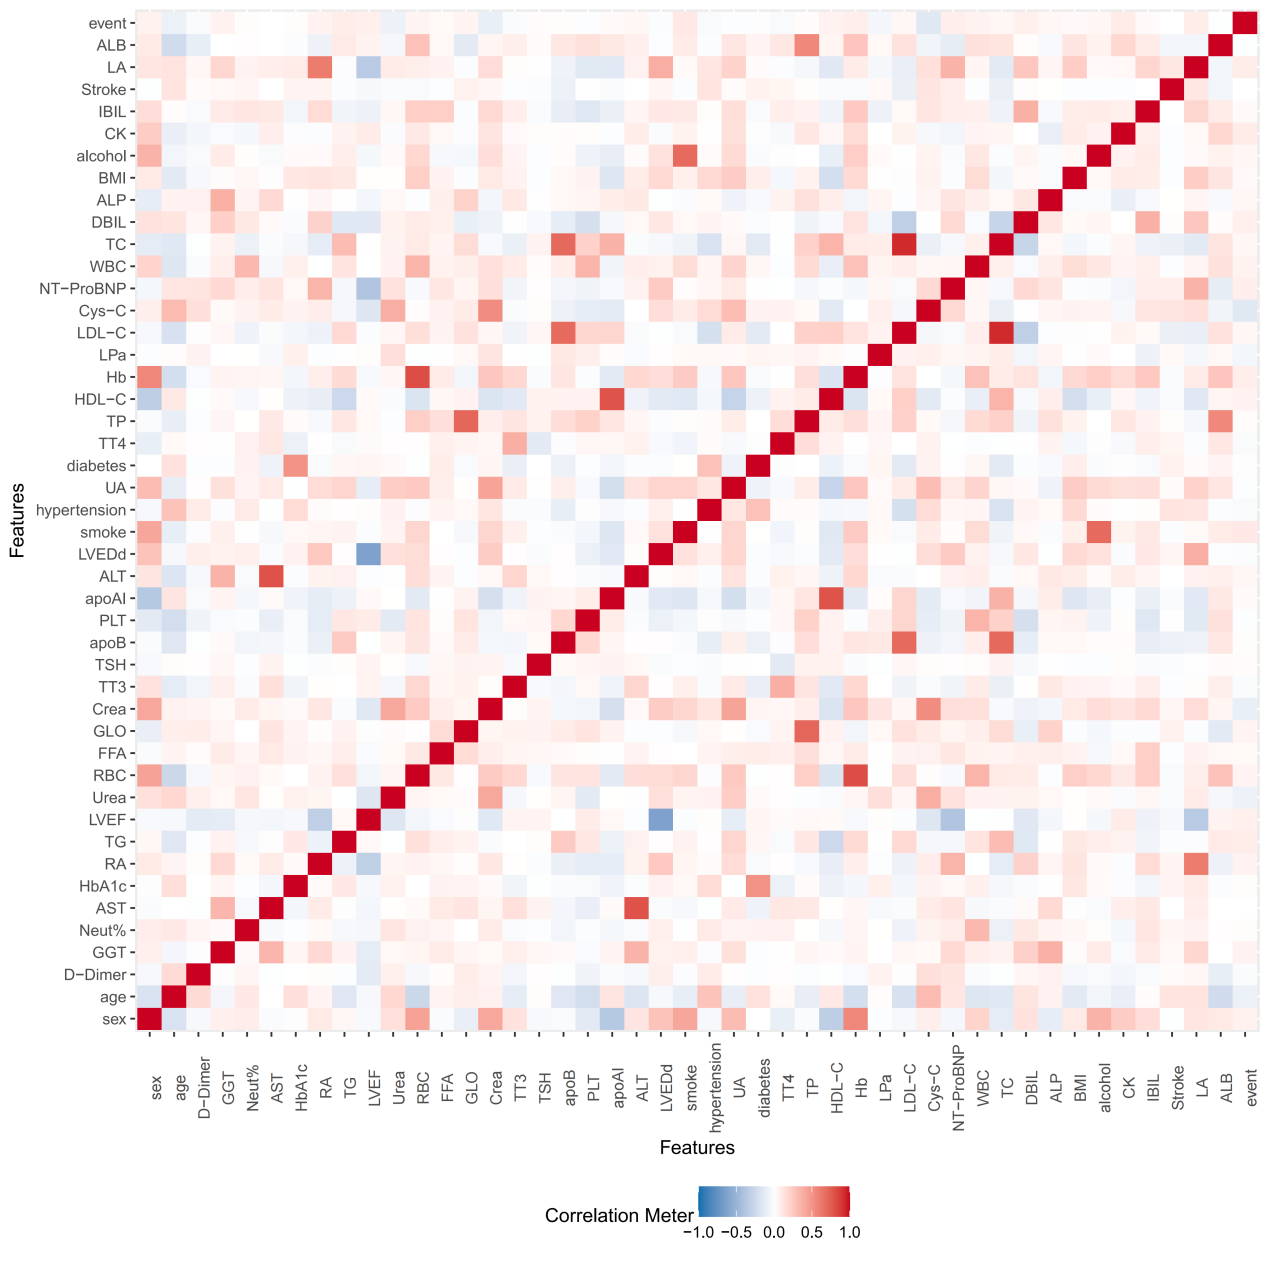


**Supplement figure 1**. Correlation Plot of Variables for the Entire Dataset

**
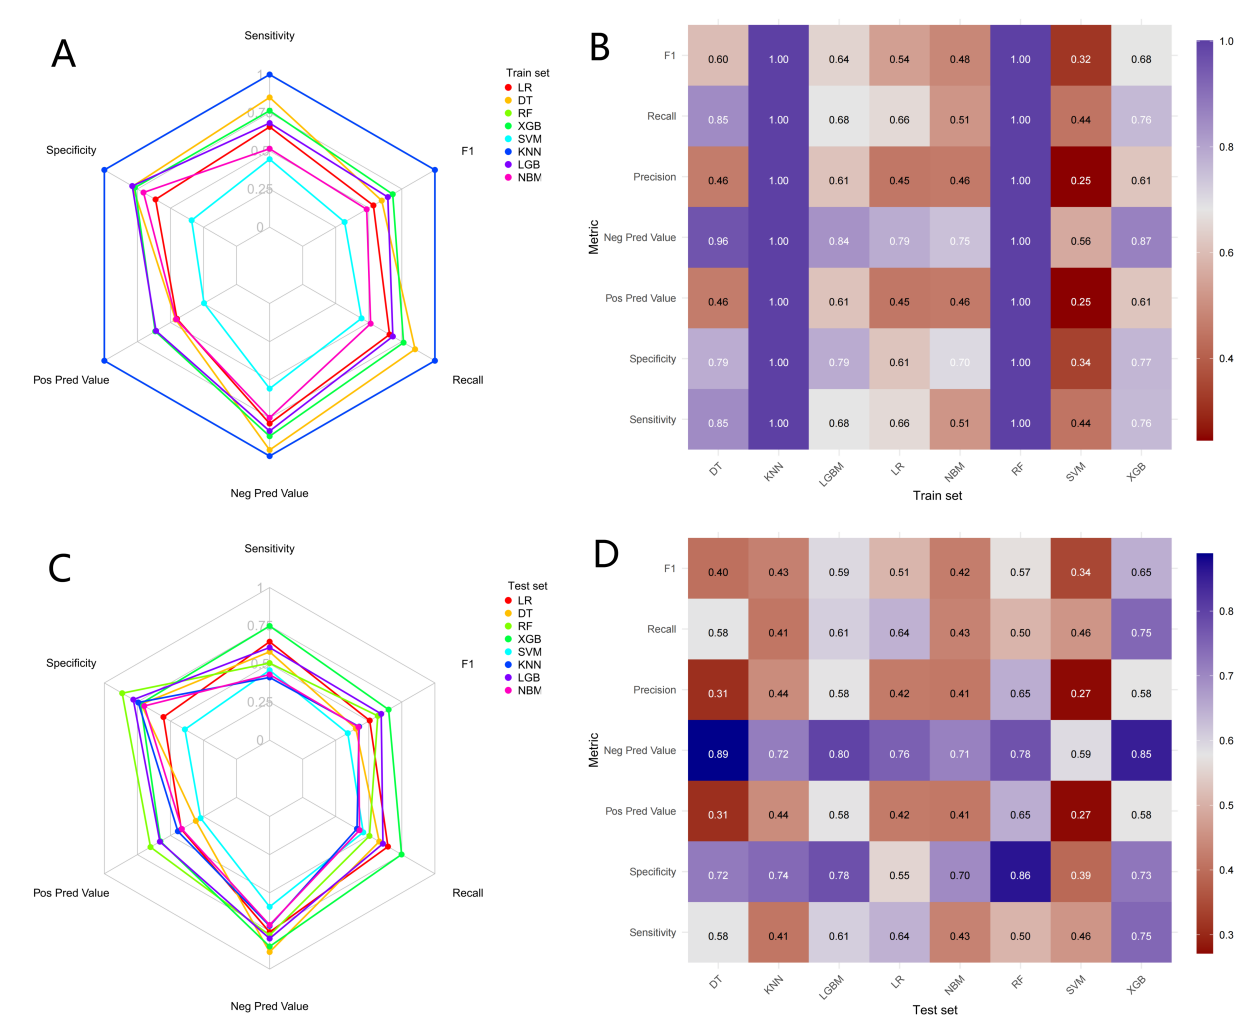
**

**Supplementary Figure 2. Visual comparison of performance metrics for machine learning models.**

(A, C) Radar plots showing six key performance metrics (F1, recall, precision, specificity, positive and negative predictive values) for each model in the training and test sets. (B, D) Corresponding heatmaps providing a color-coded summary of the same metrics. The XGBoost model demonstrated superior overall balance between sensitivity and specificity, particularly in the test set.
